# Supplementary material for: In situ embedding of cobalt sulfide quantum dots among transition metal layered double hydroxides for high performance all-solid-state asymmetric supercapacitors
Source: Royal Society of Chemistry journal article supplement (doi:10.1039/d1ta06706k), 2021-01-01
Supplement: d1ta06706k1.pdf [file d1ta06706k1.pdf]

## Electronic Supplementary Information

### **In-Situ Embedding of Cobaltous Sulfide Quantum Dots among Transition Metal Layered Double Hydroxide for High Performance All-Solid-State Asymmetric Supercapacitors**

Zhiqiang Liu<sup>a, 1</sup>, Yanling Qiu<sup>a, 1</sup>, Aitang Zhang<sup>a</sup>, Wenrong Yang<sup>b</sup>, Colin J. Barrow<sup>b</sup>,  
Joselito M. Razal<sup>c</sup>, Jingquan Liu<sup>a\*</sup>

<sup>a</sup>*College of Materials Science and Engineering, Institute for Graphene Applied*

*Technology Innovation, Qingdao University, Qingdao, 266071, China.*

<sup>b</sup>*School of Life and Environmental Sciences, Institute for Frontier Materials, Deakin*

*University, Geelong, VIC 3216, Australia.*

<sup>c</sup>*Institute for Frontier Materials, Deakin University, Geelong, VIC 3216, Australia.*

\*Corresponding authors.

Tel: +86 532 83780128.

E-mails: [jliu@qdu.edu.cn](mailto:jliu@qdu.edu.cn) (Jingquan Liu)

<sup>1</sup>Zhiqiang Liu and Yanling Qiu contributed equally to this work.

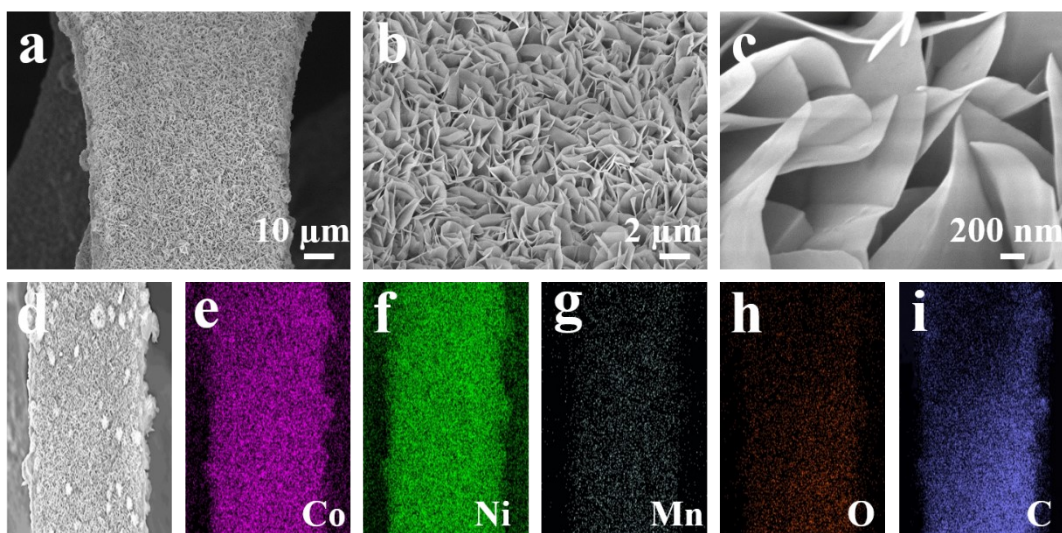

**Figure S1.** SEM micrographs of (a-c)  $\text{Ni}_1\text{Mn}_3\text{Co-LDH/NF}$  at different magnifications, (d-i) EDS elemental mapping images of  $\text{Ni}_1\text{Mn}_3\text{Co-LDH/NF}$ .

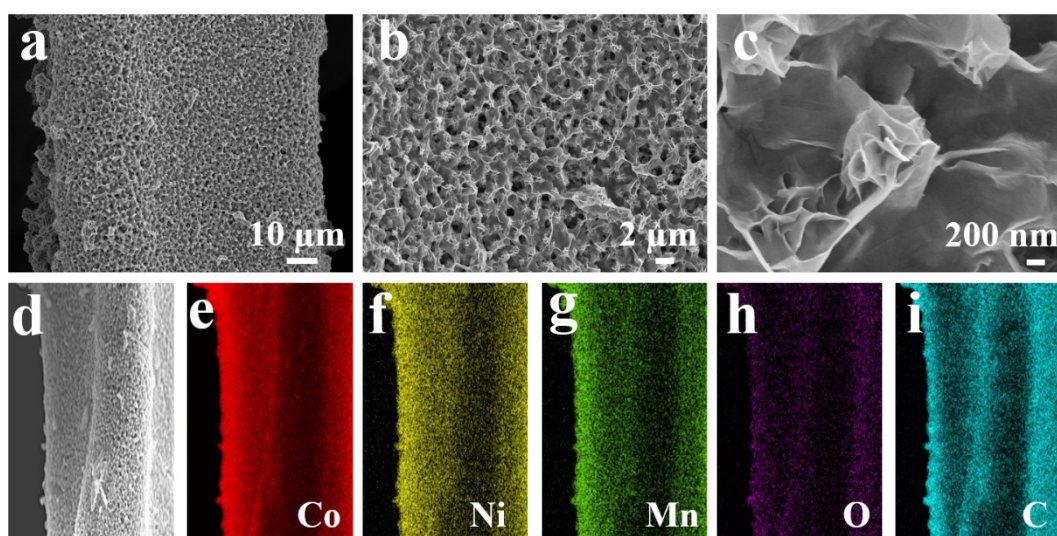

**Figure S2.** SEM micrographs of (a-c)  $\text{Ni}_2\text{Mn}_2\text{Co-LDH/NF}$  at different magnifications, (d-i) EDS elemental mapping images of  $\text{Ni}_2\text{Mn}_2\text{Co-LDH/NF}$ .

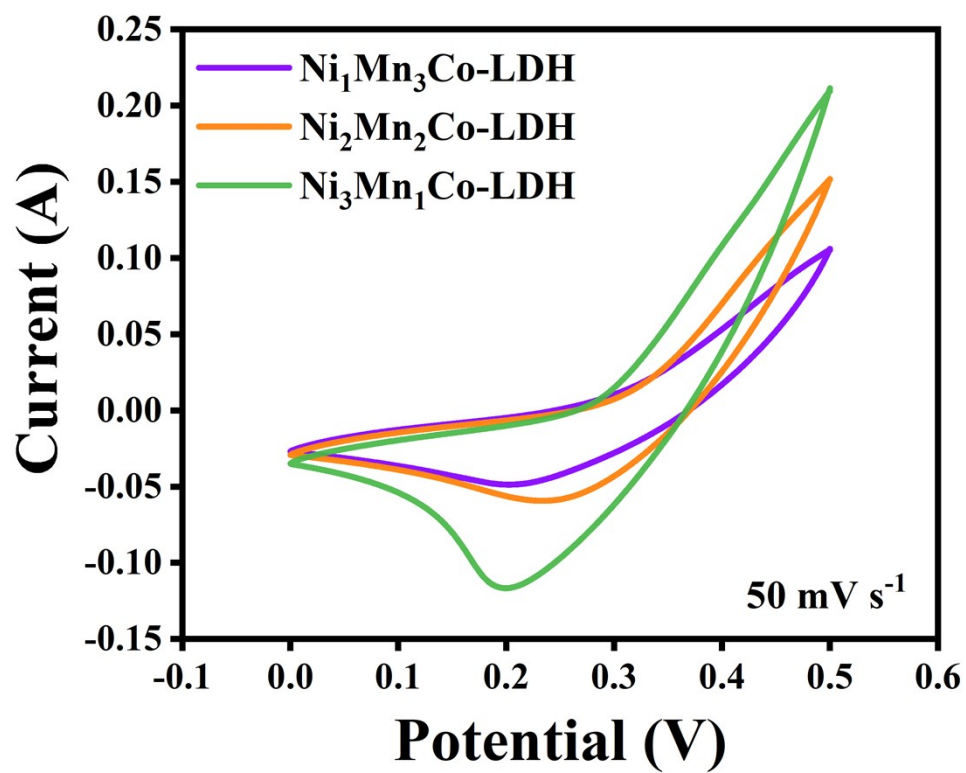

**Figure S3.** CV curves of Ni<sub>x</sub>Mn<sub>4-x</sub>Co-LDH composited with various Ni/Co ratios at

50 mV s<sup>-1</sup>.

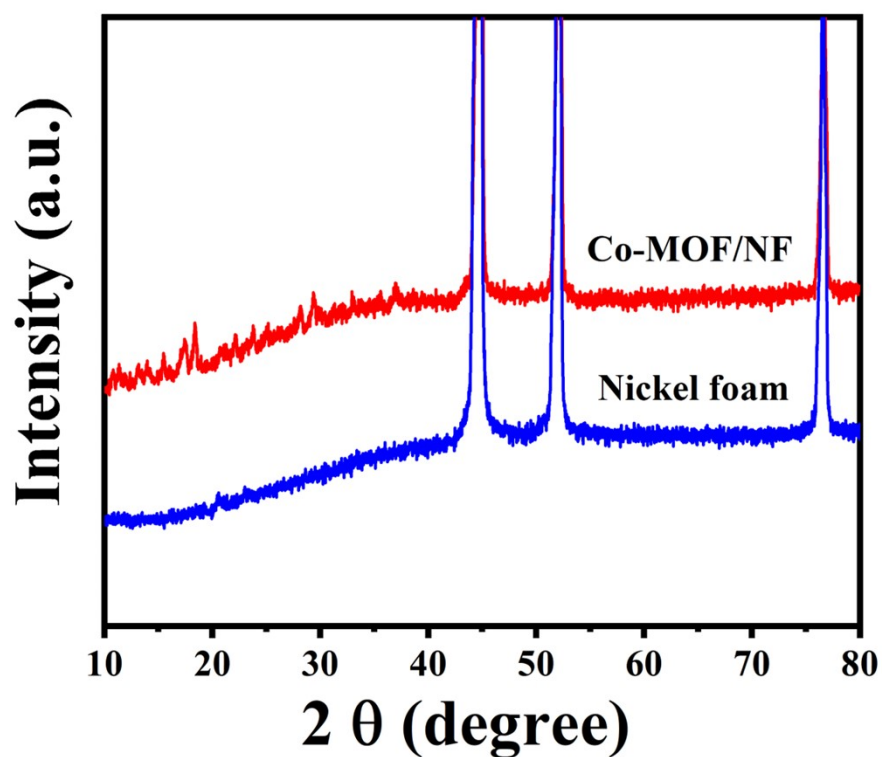

Figure S4. XRD patterns of the Co-MOF and nickel foam.

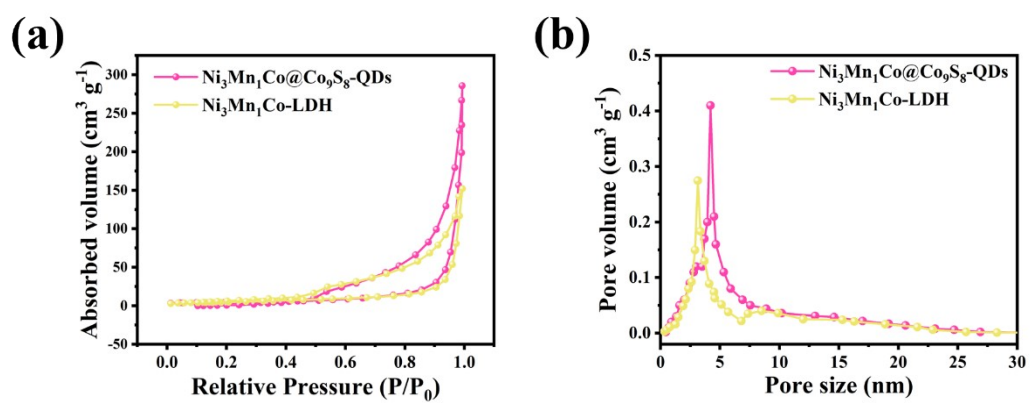

Figure S5. (a) N<sub>2</sub> adsorption-desorption isotherms and (b) pore size distribution patterns of Ni<sub>3</sub>Mn<sub>1</sub>Co-LDH/NF and Ni<sub>3</sub>Mn<sub>1</sub>Co@Co<sub>9</sub>S<sub>8</sub>-QDs/NF.

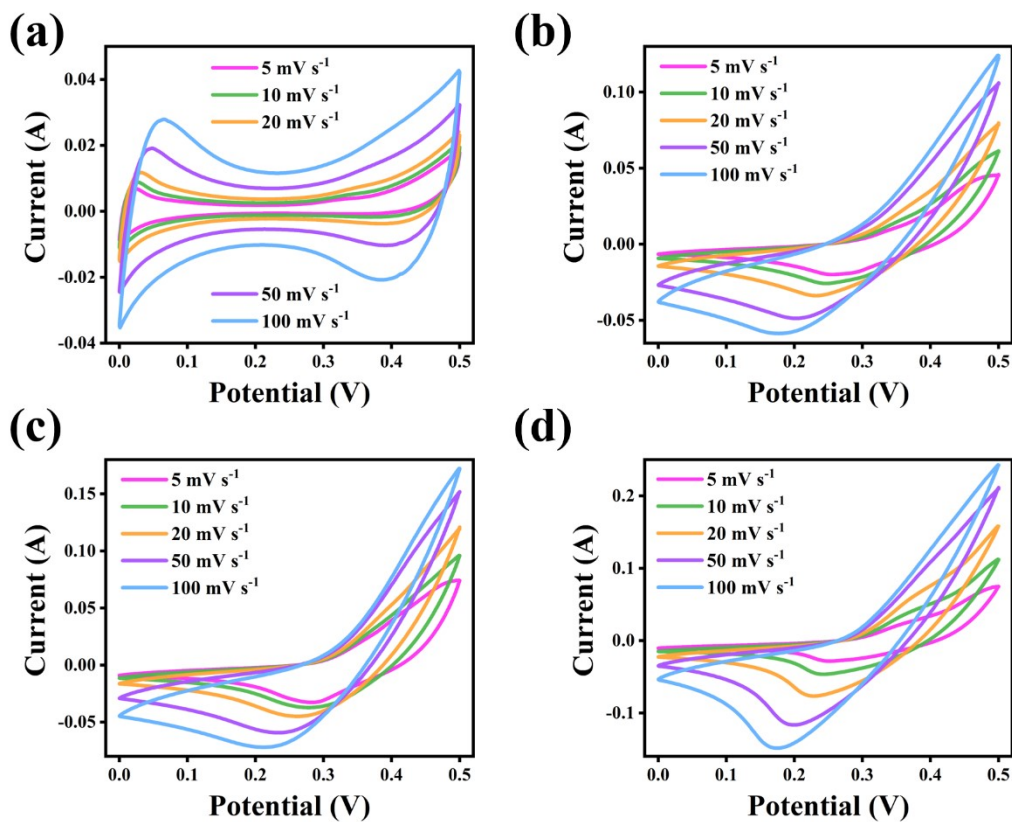

**Figure S6.** CV curves of the (a) Co-MOF/NF and (b) Ni<sub>1</sub>Mn<sub>3</sub>Co-LDH/NF and (c) Ni<sub>2</sub>Mn<sub>2</sub>Co-LDH/NF and (d) Ni<sub>3</sub>Mn<sub>1</sub>Co-LDH/NF electrode at different scan rates ranging from 5 to 100 mV s<sup>-1</sup>.

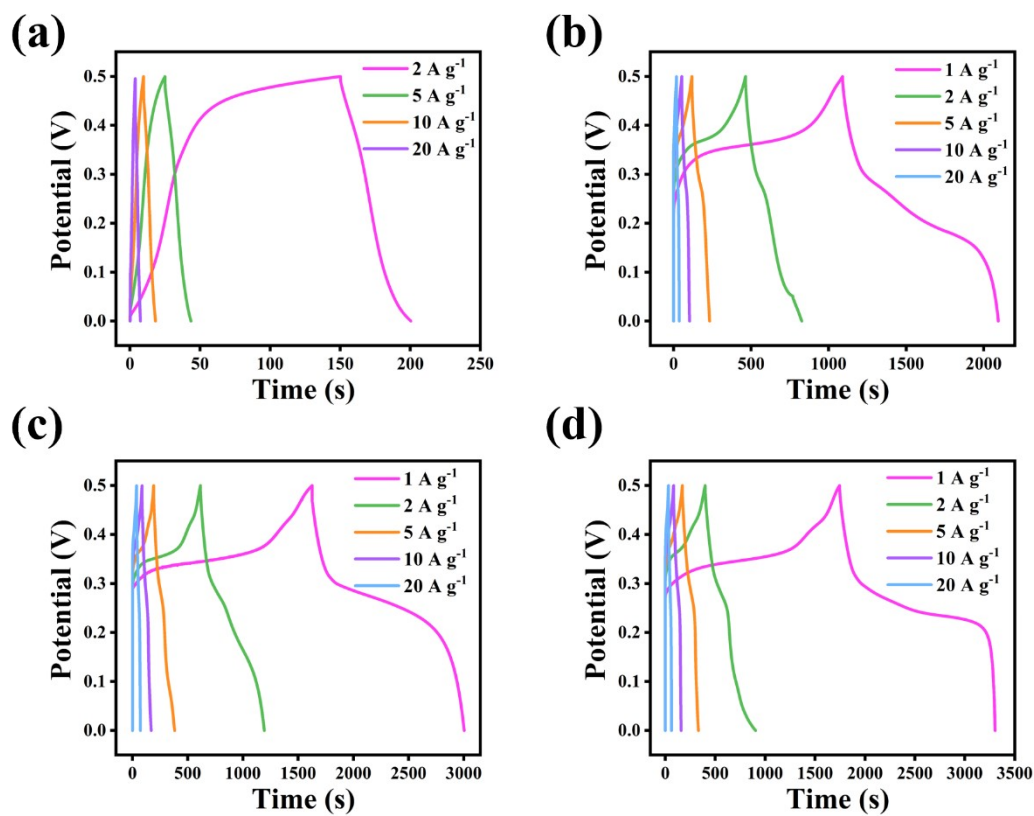

**Figure S7.** GCD curves of the (a) Co-MOF/NF and (b) Ni<sub>1</sub>Mn<sub>3</sub>Co-LDH/NF and (c) Ni<sub>2</sub>Mn<sub>2</sub>Co-LDH/NF and (d) Ni<sub>3</sub>Mn<sub>1</sub>Co-LDH/NF electrode at different current densities ranging from 1 to 20 A g<sup>-1</sup>.

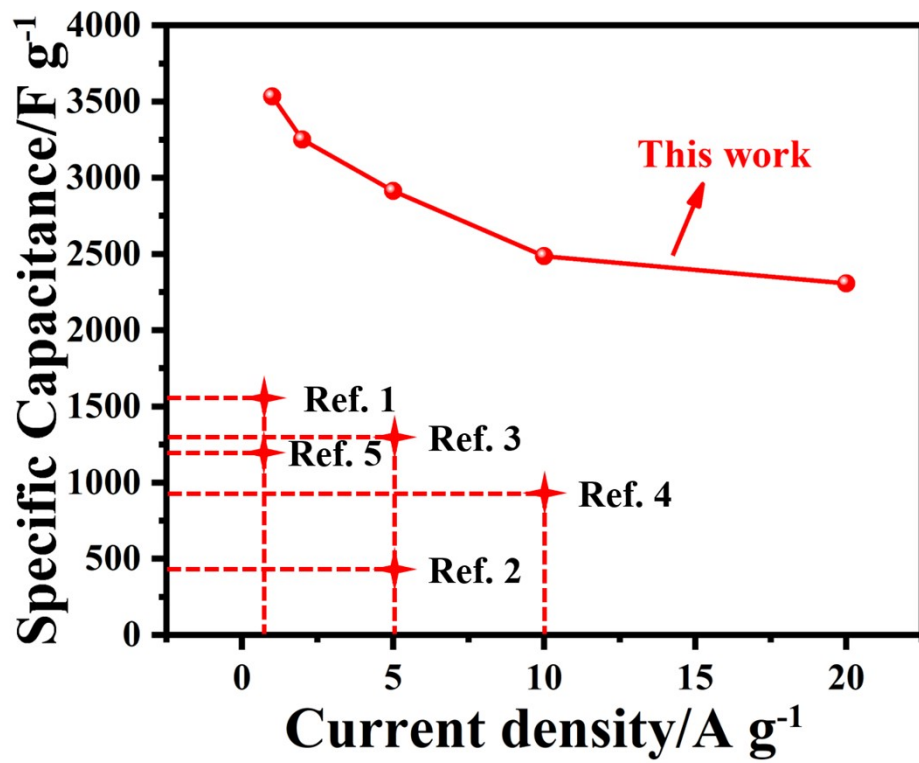

**Figure S8.** A comparison of the specific capacitances of our Ni<sub>3</sub>Mn<sub>1</sub>Co@Co<sub>9</sub>S<sub>8</sub>-QDs/NF electrode with those previously reported cobalt sulfide electrode materials.

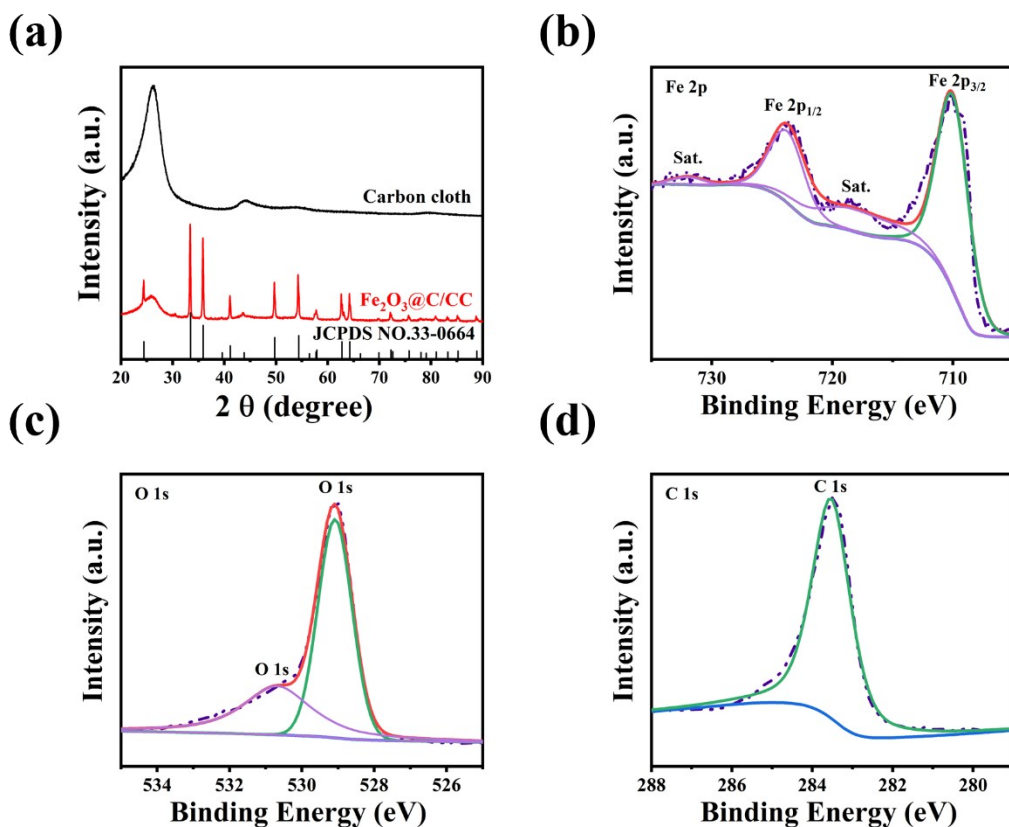

**Figure S9.** (a) XRD patterns of the Fe<sub>2</sub>O<sub>3</sub>@C/CC. The narrow spectra of (b) Fe 2p, (c) O 1s and (d) C 1s for Fe<sub>2</sub>O<sub>3</sub>@C/CC.

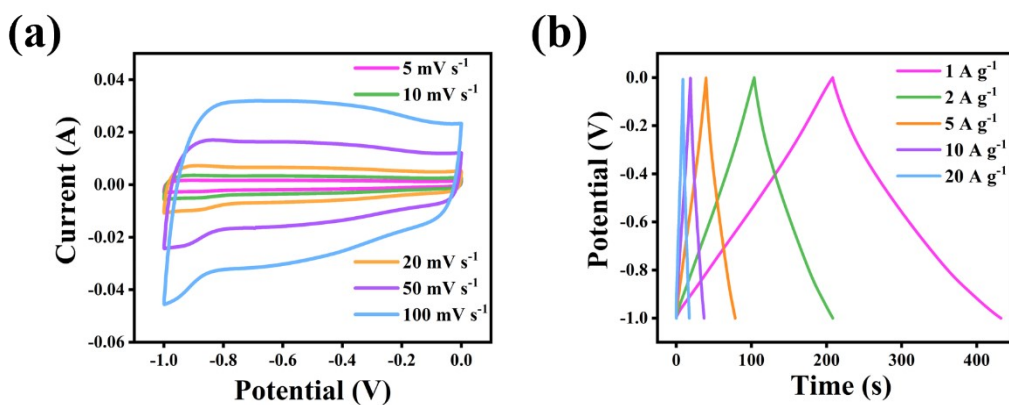

**Figure S10.** (a) CV curves of the Fe<sub>2</sub>O<sub>3</sub>@C/CC electrode at different scan rates ranging from 5 to 100 mV s<sup>-1</sup> (b) GCD curves of the Fe<sub>2</sub>O<sub>3</sub>@C/CC electrode at different current densities ranging from 1 to 20 A g<sup>-1</sup>.



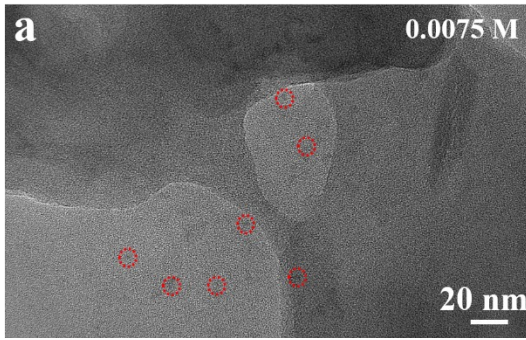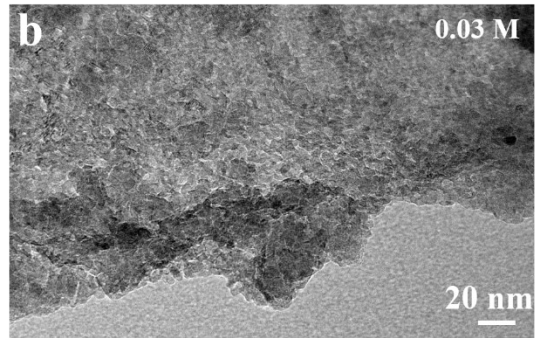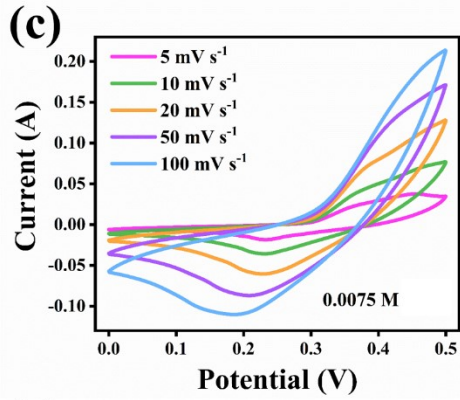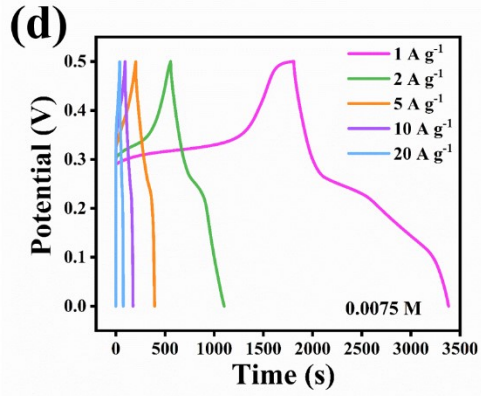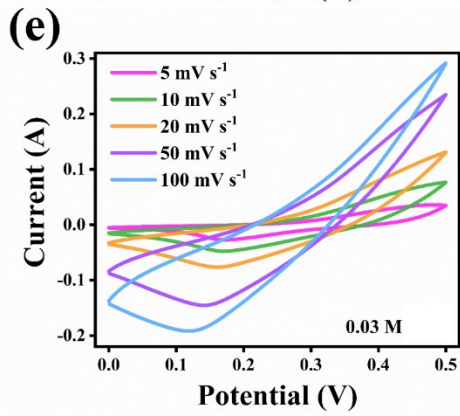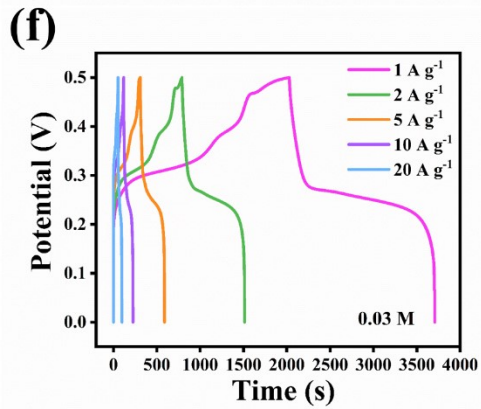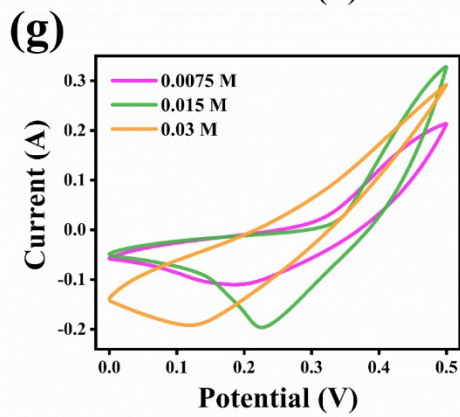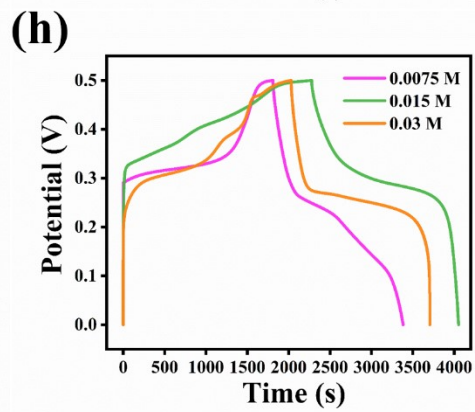

**Figure S11** (a, b) TEM images of Co<sub>9</sub>S<sub>8</sub>-QDs synthesized from different concentrations of TAA (c-h) CV and GCD curves of Co<sub>9</sub>S<sub>8</sub>-QDs synthesized from different concentrations of TAA.

| Active material                                                           | Electrolyte | Capacitance                                                                   | Energy density            | Ref.      |
|---------------------------------------------------------------------------|-------------|-------------------------------------------------------------------------------|---------------------------|-----------|
| Ni <sub>3</sub> Mn <sub>1</sub> Co@Co <sub>9</sub> S <sub>8</sub> -QDs/NF | 6 M KOH     | 492.1 mAh g <sup>-1</sup><br>(3534 F g <sup>-1</sup> ) at 1 A g <sup>-1</sup> | 71.48 Wh kg <sup>-1</sup> | This work |
| CoS-NiO                                                                   | 3 M KCl     | 1527 F g <sup>-1</sup> at 1 A g <sup>-1</sup>                                 | 39 Wh kg <sup>-1</sup>    | [1]       |
| Co <sub>3</sub> O <sub>4</sub> /CoS NSs                                   | 2 M KOH     | 1658 F g <sup>-1</sup> at 1 A g <sup>-1</sup>                                 | 23.6 Wh kg <sup>-1</sup>  | [4]       |
| 5-NiS@CoS                                                                 | 2 M KOH     | 1210 F g <sup>-1</sup> at 1 A g <sup>-1</sup>                                 | 24.1 Wh kg <sup>-1</sup>  | [5]       |
| KCu <sub>7</sub> S <sub>4</sub> @NiMn LDHs                                | 1 M LiOH    | 879 F g <sup>-1</sup> at 1 mV s <sup>-1</sup>                                 | 15.9 Wh kg <sup>-1</sup>  | [6]       |
| CC@NiCo-LDH/Co <sub>9</sub> S <sub>8</sub>                                | 6 M KOH     | 2438 F g <sup>-1</sup> at 5 A g <sup>-1</sup>                                 | 38 Wh kg <sup>-1</sup>    | [7]       |
| MC@CF-LDH-3                                                               | 6 M KOH     | 903.15 C g <sup>-1</sup> at 1 A g <sup>-1</sup>                               | 60.82 Wh kg <sup>-1</sup> | [8]       |
| NiCoP/NiCo-OH30                                                           | 3 M KOH     | 1100 F g <sup>-1</sup> at 1 A g <sup>-1</sup>                                 | 34 Wh kg <sup>-1</sup>    | [9]       |

**Table S1** Compared the performances reported in our work and those recently reported on LDHs and cobalt sulfide related materials for supercapacitors.

## References

- [1] V. Kumbhar, H. Lee, J. Lee, N. Chodankar and K. Lee, *J. Alloy. Compd.*, 2021, **863**, 158064.
- [2] J. Jiang, J. Xu, W. Wang, L. Zhang and G. Xu, *Chemistry*, 2020, **26**, 14903-14911.
- [3] M. Chuai, H. Zhang, Y. Tong, K. Zhang and M. Zhang, *Sustain. Energy. Fuels*, 2020, **4**, 3511-3518.
- [4] Y. Lu, W. Yang, W. Li, M. Chen, L. Shuai, P. Qi, D. Zhang, H. Du, Y. Tang and M. Qiu, *J. Alloy. Compd.*, 2020, **818**, 152877.
- [5] Y. Miao, X. Zhang, J. Zhan, Y. Sui, J. Qi, F. Wei, Q. Meng, Y. He, Y. Ren, Z. Zhan and Z. Sun, *Adv. Mater. Inter.*, 2019, **7**, 1901618.
- [6] X. Guo, J. Zhang, W. Xu, C. Hu, L. Sun and Y. Zhang, *J. Mater. Chem. A*, 2017, **5**, 20579-20587.
- [7] Q. Yang, Y. Liu, L. Xiao, M. Yan, H. Bai, F. Zhu, Y. Lei and W. Shi, *Chem. Eng. J.*, 2018, **354**, 716-726.
- [8] Z. Liu, Y. Liu, Y. Zhong L., Cui, W. Yang, J. M. Razal, C. J. Barrow and J. Liu, *J. Power Sources*, 2021, **484**, 229288.
- [9] X. Li, H. Wu, A. Elshahawy, L. Wang, S. Pennycook, C. Guan and J. Wang, *Adv. Funct. Mater.*, 2018, **28**, 1800036.
